# Supplementary material for: “Design of novel WO3/CB nanohybrids” An affordable and efficient electrochemical sensor for the detection of multifunctional flavonoid rutin
Source: Royal Society of Chemistry journal article supplement (doi:10.1039/c8qi00028j), 2018-01-01
Supplement: c8qi00028j1.pdf [file c8qi00028j1.pdf]

**“Design of novel WO<sub>3</sub>/CB nanohybrids” An affordable and efficient electrochemical sensor for the detection of multifunctional flavonoid rutin**

Subbiramaniyan Kubendhiran<sup>a</sup>, Rajalakshmi Sakthivel<sup>a</sup>, Shen-Ming Chen<sup>b\*</sup> Qin-Jin Yeah<sup>a</sup>,  
Bhuvanenthiran Mutharani<sup>a</sup>, Balamurugan Thirumalraj<sup>a,b</sup>

<sup>a</sup>Department of Chemical Engineering and Biotechnology, National Taipei University of Technology, Taipei 106, Taiwan, ROC.

<sup>b</sup>Department of Chemical Engineering, National Taiwan University of Science and Technology, Taipei 10607, Taiwan

**Corresponding Author:**

\*S.M. Chen, Fax: +886227025238, Tel: +886227017147, E mail: [smchen78@ms15.hinet.net](mailto:smchen78@ms15.hinet.net)

Figure S1

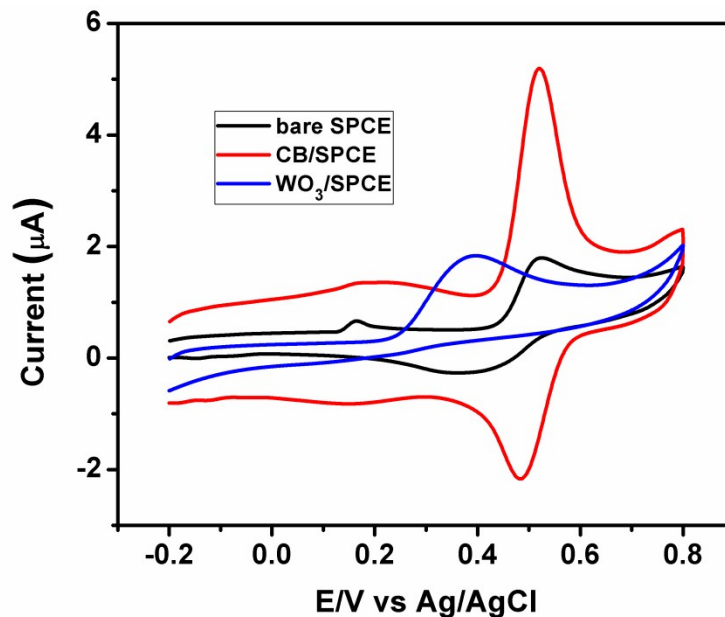

Figure S1 CV response of 100 μM rutin for (a) bare SPCE, WO<sub>3</sub>/SPCE and CB/SPCE in 0.05M PB solution at the scan rate of 50 mV/s.

Figure S2

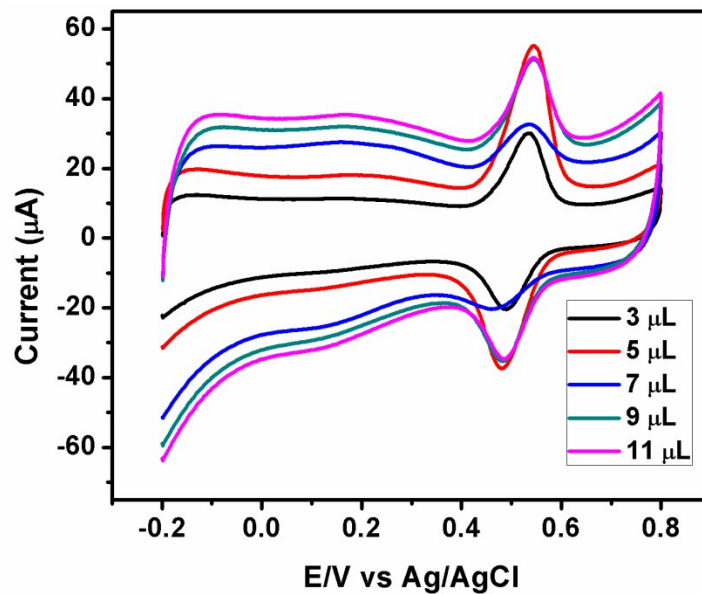

Figure S2 CV response of different drop casting volume of CB/WO<sub>3</sub> towards the electro oxidation of 100μM rutin.
